# Supplementary material for: Hepatic Involvement across the Metabolic Syndrome Spectrum: Non-Invasive Assessment and Risk Prediction Using Machine Learning
Source: MDPI journal article supplement (doi:10.3390/jcm12175657), 2023-08-30
Supplement: s1 [file s1]

**Table S1. Formulas for the scores used in our study**

| Score   | Formula                                                                                                                                                                                                                                                                                                                                                                                                       |
|---------|---------------------------------------------------------------------------------------------------------------------------------------------------------------------------------------------------------------------------------------------------------------------------------------------------------------------------------------------------------------------------------------------------------------|
| APRI    | $100 \times \frac{\frac{AST (U/L)}{ULN AST (U/L)}}{PLT(10^9/L)}$                                                                                                                                                                                                                                                                                                                                              |
| FIB4    | $\frac{Age \times AST (U/L)}{PLT(10^9/L) \times \sqrt{ALT (U/L)}}$                                                                                                                                                                                                                                                                                                                                            |
| Agile3+ | $\frac{e^{-3.92368+2.29714 \times \ln E(kPa) - 0.00902 \times PLT(10^9/L) - 0.98633 \times \frac{ALT (U/L)}{AST (U/L)} + 1.08636 \times [Diabetes] - 0.38581 \times [Gender] + 0.03018 \times Age (y)}}{1 + e^{-3.92368+2.29714 \times \ln E(kPa) - 0.00902 \times PLT(10^9/L) - 0.98633 \times \frac{ALT (U/L)}{AST (U/L)} + 1.08636 \times [Diabetes] - 0.38581 \times [Gender] + 0.03018 \times Age (y)}}$ |
| Agile 4 | $\frac{e^{7.50139+15.42498 \times \frac{1}{\sqrt{E(kPa)}} - 0.01378 \times PLT(10^9/L) - 1.41149 \times \frac{ALT (U/L)}{AST (U/L)} - 0.53281 \times [Gender] + 0.41741 \times [Diabetes]}}{1 + e^{7.50139+15.42498 \times \frac{1}{\sqrt{E(kPa)}} - 0.01378 \times PLT(10^9/L) - 1.41149 \times \frac{ALT (U/L)}{AST (U/L)} - 0.53281 \times [Gender] + 0.41741 \times [Diabetes]}}$                         |
| HSI     | $8 \times \frac{ALT(U/L)}{AST(U/L)} + BMI + 2(\text{if type 2 diabetes}) + 2(\text{if female})$                                                                                                                                                                                                                                                                                                               |

where ULN AST is the upper limit of the normal range for AST, PLT is platelet count, diabetes is 1 for patients with diabetes and 0 otherwise, and gender is 1 for males and 0 for females.

**Table S2. Differences between genders**

| Variable                       | Descriptive Parameter | Gender        |             | p-Value  |
|--------------------------------|-----------------------|---------------|-------------|----------|
|                                |                       | Female        | Male        |          |
| BMI (kg/m <sup>2</sup> )       | Mean                  | 29.93         | 28.32       | 0.024    |
|                                | StdDev                | 5.67          | 4.9         |          |
|                                | IQR                   | 7.2           | 5.7         |          |
|                                | MIN                   | 18.7          | 19.5        |          |
|                                | MAX                   | 47.7          | 49.3        |          |
|                                | 95%CI                 | 28.93–30.93   | 27.3–29.34  |          |
| ALT (U/L)                      | Mean                  | 33.67         | 37.15       | P = 0.01 |
|                                | StdDev                | 31.53         | 24.71       |          |
|                                | IQR                   | 18            | 24          |          |
|                                | MIN                   | 7             | 7           |          |
|                                | MAX                   | 189           | 146         |          |
|                                | 95%CI                 | 28.12–39.23   | 32.01–42.3  |          |
| Platelets (10 <sup>9</sup> /L) | Mean                  | 273.37        | 244.25      | P < 0.01 |
|                                | StdDev                | 78.74         | 69.38       |          |
|                                | IQR                   | 103           | 83          |          |
|                                | MIN                   | 53            | 72          |          |
|                                | MAX                   | 546           | 441         |          |
|                                | 95%CI                 | 259.48–287.25 | 229.8–258.7 |          |
| APRI                           | Mean                  | 0.36          | 0.41        | < 0.01   |
|                                | StdDev                | 0.39          | 0.33        |          |
|                                | IQR                   | 0.21          | 0.25        |          |
|                                | MIN                   | 0.08          | 0.07        |          |
|                                | MAX                   | 3.16          | 2.06        |          |
|                                | 95%CI                 | 0.3–0.43      | 0.34–0.48   |          |
|                                | Mean                  | 1             | 0.92        | 0.023    |
|                                | StdDev                | 0.38          | 0.44        |          |

|     |        |            |             |        |
|-----|--------|------------|-------------|--------|
| AAR | IQR    | 0.46       | 0.43        | < 0.01 |
|     | MIN    | 0.22       | 0.38        |        |
|     | MAX    | 2.38       | 2.38        |        |
|     | 95%CI  | 0.94–1.08  | 0.84–1.02   |        |
| HSI | Mean   | 42.04      | 39.2932     |        |
|     | StdDev | 7.03       | 7.2         |        |
|     | IQR    | 10.21      | 10.18       |        |
|     | MIN    | 26.7       | 27.39       |        |
|     | MAX    | 69.41      | 65.73       |        |
|     | 95%CI  | 40.8–43.28 | 37.79–40.79 |        |

**Table S3. General characteristics and measured parameters in patients with or without metabolic syndrome**

| Variable                       | Descriptive Parameter | Metabolic Syndrome |               | p-Value   |
|--------------------------------|-----------------------|--------------------|---------------|-----------|
|                                |                       | No                 | Yes           |           |
| Age (years)                    | Mean                  | 53.10              | 62.78         | < 0.01    |
|                                | StdDev                | 14.08              | 10.53         |           |
|                                | IQR                   | 21                 | 12            |           |
|                                | MIN                   | 19                 | 30            |           |
|                                | MAX                   | 84                 | 85            |           |
|                                | 95%CI                 | 50.42–55.79        | 60.78–64.78   |           |
| BMI (kg/m <sup>2</sup> )       | Mean                  | 26.51              | 31.97         | < 0.01    |
|                                | StdDev                | 3.95               | 5.29          |           |
|                                | IQR                   | 4.4                | 7             |           |
|                                | MIN                   | 18.70              | 20.50         |           |
|                                | MAX                   | 40.60              | 49.30         |           |
|                                | 95%CI                 | 25.76–27.27        | 30.96–32.97   |           |
| AST (U/L)                      | Mean                  | 25.72              | 32.94         | < 0.01    |
|                                | StdDev                | 14.88              | 25.87         |           |
|                                | IQR                   | 12                 | 18            |           |
|                                | MIN                   | 11                 | 10            |           |
|                                | MAX                   | 100                | 217           |           |
|                                | 95%CI                 | 22.88–28.56        | 28.03–37.86   |           |
| ALT (U/L)                      | Mean                  | 30.54              | 39.69         | < 0.01    |
|                                | StdDev                | 23.88              | 35.53         |           |
|                                | IQR                   | 17                 | 25            |           |
|                                | MIN                   | 1                  | 8             |           |
|                                | MAX                   | 189                | 183           |           |
|                                | 95%CI                 | 25.98–35.09        | 33.51–45.86   |           |
| Platelets (10 <sup>9</sup> /L) | Mean                  | 271.21             | 251.19        | P = 0.034 |
|                                | StdDev                | 64.80              | 85.08         |           |
|                                | IQR                   | 83                 | 117           |           |
|                                | MIN                   | 116                | 53            |           |
|                                | MAX                   | 546                | 480           |           |
|                                | 95%CI                 | 258.85–283.57      | 235.04–267.35 |           |
| CAP (dB/m)                     | Mean                  | 259.84             | 301.44        | < 0.01    |
|                                | StdDev                | 54.03              | 46.66         |           |
|                                | IQR                   | 80                 | 60            |           |
|                                | MIN                   | 101                | 153           |           |
|                                | MAX                   | 390                | 400           |           |
|                                | 95%CI                 | 249.54–270.15      | 292.58–310.30 |           |
| E (kPa)                        | Mean                  | 5.15               | 8.67          | < 0.01    |

|         |        |               |               |          |
|---------|--------|---------------|---------------|----------|
|         | StdDev | 3.05          | 5.84          |          |
|         | IQR    | 1.6           | 4.9           |          |
|         | MIN    | 2.1           | 2.1           |          |
|         | MAX    | 28.6          | 38            |          |
|         | 95%CI  | 4.57–5.73     | 7.57–9.78     |          |
| APRI    | Mean   | 0.30          | 0.47          | < 0.01   |
|         | StdDev | 0.22          | 0.45          |          |
|         | IQR    | 0.16          | 0.31          |          |
|         | MIN    | 0.09          | 0.07          |          |
|         | MAX    | 1.60          | 3.16          |          |
|         | 95%CI  | 0.26–0.34     | 0.38–0.55     |          |
| FIB4    | Mean   | 1.04          | 1.67          | < 0.01   |
|         | StdDev | 0.64          | 1.62          |          |
|         | IQR    | 0.55          | 0.94          |          |
|         | MIN    | 0.22          | 0.33          |          |
|         | MAX    | 4.40          | 11.49         |          |
|         | 95%CI  | 0.92–1.16     | 1.36–1.98     |          |
| AAR     | Mean   | 0.99          | 0.96          | P > 0.05 |
|         | StdDev | 0.42          | 0.39          |          |
|         | IQR    | 0.48          | 0.48          |          |
|         | MIN    | 0.44          | 0.22          |          |
|         | MAX    | 2.57          | 2.58          |          |
|         | 95%CI  | 0.92–1.07     | 0.88–1.03     |          |
| Agile3+ | Mean   | 0.1504        | 0.4359        | < 0.01   |
|         | StdDev | 0.1749        | 0.3010        |          |
|         | IQR    | 0.1597        | 0.5468        |          |
|         | MIN    | 0.0036        | 0.0101        |          |
|         | MAX    | 0.9658        | 0.9977        |          |
|         | 95%CI  | 0.117–0.1838  | 0.3789–0.4931 |          |
| Agile4  | Mean   | 0.0243        | 0.1158        | < 0.01   |
|         | StdDev | 0.0892        | 0.2228        |          |
|         | IQR    | 0.0134        | 0.0878        |          |
|         | MIN    | 0.0001        | 0.0003        |          |
|         | MAX    | 0.6921        | 0.9610        |          |
|         | 95%CI  | 0.0073–0.6921 | 0.0735–0.1581 |          |
| HSI     | Mean   | 37.33         | 44.41         | < 0.01   |
|         | StdDev | 5.69          | 6.84          |          |
|         | IQR    | 8.52          | 9.53          |          |
|         | MIN    | 26.7          | 31.30         |          |
|         | MAX    | 51.3          | 69.41         |          |
|         | 95%CI  | 36.25–38.42   | 43.11–45.71   |          |

**Table S4. Differences between clusters (continuous variables)**

| Variable                 | Descriptive Parameter | Cluster     |             |            | p-Value |
|--------------------------|-----------------------|-------------|-------------|------------|---------|
|                          |                       | 1           | 2           | 3          |         |
| Age (years)              | Mean                  | 53.62       | 60.5        | 64.76      | < 0.01  |
|                          | StdDev                | 15.11       | 10.94       | 9.15       |         |
|                          | IQR                   | 23          | 15          | 15         |         |
|                          | MIN                   | 19          | 35          | 35         |         |
|                          | MAX                   | 84          | 85          | 85         |         |
|                          | 95%CI                 | 50.51–56.74 | 58.36–62.63 | 60.6–68.93 |         |
| BMI (kg/m <sup>2</sup> ) | Mean                  | 27.61       | 30.3        | 31.43      | < 0.01  |

|                                   |        |               |               |               |        |
|-----------------------------------|--------|---------------|---------------|---------------|--------|
|                                   | StdDev | 4.95          | 5.12          | 6.76          |        |
|                                   | IQR    | 6.4           | 6.1           | 11.7          |        |
|                                   | MIN    | 20.3          | 18.7          | 23.9          |        |
|                                   | MAX    | 47.7          | 46.5          | 49.3          |        |
|                                   | 95%CI  | 26.59–28.63   | 29.3–31.3     | 28.36–34.51   |        |
| AST (U/L)                         | Mean   | 24.13         | 33.36         | 32.81         | < 0.01 |
|                                   | StdDev | 11.45         | 27.29         | 17.79         |        |
|                                   | IQR    | 11            | 18            | 20            |        |
|                                   | MIN    | 10            | 12            | 11            |        |
|                                   | MAX    | 62            | 217           | 76            |        |
|                                   | 95%CI  | 21.77–26.49   | 28.03–38.69   | 24.71–40.91   |        |
| ALT (U/L)                         | Mean   | 28.94         | 40.7          | 35.29         | < 0.01 |
|                                   | StdDev | 20.09         | 34.84         | 24.6          |        |
|                                   | IQR    | 16            | 25            | 26            |        |
|                                   | MIN    | 7             | 7             | 7             |        |
|                                   | MAX    | 94            | 189           | 116           |        |
|                                   | 95%CI  | 24.8–33.07    | 33.89–47.51   | 24.08–46.49   |        |
| Platelets<br>(10 <sup>9</sup> /L) | Mean   | 261.34        | 268.08        | 226.38        | < 0.01 |
|                                   | StdDev | 63.06         | 81.14         | 96.24         |        |
|                                   | IQR    | 80            | 108           | 170           |        |
|                                   | MIN    | 72            | 53            | 99            |        |
|                                   | MAX    | 441           | 546           | 408           |        |
|                                   | 95%CI  | 248.36–274.33 | 252.22–283.93 | 182.57–270.19 |        |
| APRI                              | Mean   | 0.29          | 0.43          | 0.56          | < 0.01 |
|                                   | StdDev | 0.17          | 0.44          | 0.49          |        |
|                                   | IQR    | 0.17          | 0.21          | 0.51          |        |
|                                   | MIN    | 0.07          | 0.08          | 0.09          |        |
|                                   | MAX    | 0.86          | 3.16          | 1.86          |        |
|                                   | 95%CI  | 0.26–0.33     | 0.34–0.51     | 0.34–0.79     |        |
| FIB4                              | Mean   | 1.09          | 1.45          | 2.1           | < 0.01 |
|                                   | StdDev | 0.68          | 1.52          | 1.58          |        |
|                                   | IQR    | 0.74          | 0.78          | 2.23          |        |
|                                   | MIN    | 0.22          | 0.34          | 0.71          |        |
|                                   | MAX    | 3.71          | 11.49         | 5.86          |        |
|                                   | 95%CI  | 0.95–1.23     | 1.15–1.75     | 1.38–2.81     |        |
| AAR                               | Mean   | 1             | 0.94          | 1.06          | 0.240  |
|                                   | StdDev | 0.42          | 0.4           | 0.4           |        |
|                                   | IQR    | 0.51          | 0.45          | 0.61          |        |
|                                   | MIN    | 0.45          | 0.22          | 0.38          |        |
|                                   | MAX    | 2.43          | 2.58          | 1.84          |        |
|                                   | 95%CI  | 0.91–1.08     | 0.86–1.02     | 0.88–1.24     |        |
| HSI                               | Mean   | 38.67         | 42.51         | 42.69         | < 0.01 |
|                                   | StdDev | 6.47          | 7.07          | 8.63          |        |
|                                   | IQR    | 9.83          | 8.53          | 10.37         |        |
|                                   | MIN    | 26.8          | 26.7          | 30.19         |        |
|                                   | MAX    | 56.74         | 69.41         | 61.80         |        |
|                                   | 95%CI  | 37.34–40      | 41.14–43.9    | 38.76–46.62   |        |

**Table S5. Differences between clusters (MetS components)**

| Variable | Descriptive Parameter | Cluster    |            |            | p-Value |
|----------|-----------------------|------------|------------|------------|---------|
|          |                       | 1          | 2          | 3          |         |
| MetS     | Frequency (%)         | 28 (30.1%) | 63 (61,2%) | 18 (85,7%) | < 0.01  |
| WC       | Frequency (%)         | 27 (29%)   | 64 (62.1%) | 12 (57.1%) | < 0.01  |
| BP       | Frequency (%)         | 40 (43%)   | 67 (65%)   | 19 (90,5%) | < 0.01  |
| FG/T2DM  | Frequency (%)         | 46 (49,5%) | 79 (76,7%) | 17 (81%)   | < 0.01  |
| TGL      | Frequency (%)         | 24 (25,8%) | 42 (40,7%) | 14 (66.7%) | < 0.01  |
| HDL      | Frequency (%)         | 19 (20,4%) | 43 (41,7%) | 13 (61.9%) | < 0.01  |

where WC is waist circumference  $\geq 94/\geq 80$  cm for men/women; BP is arterial pressure  $\geq 130/85$  mm Hg or treated for hypertension; FG/T2DM is fasting glucose  $\geq 100$  mg/dl or treated for T2DM; TGL is serum triglycerides  $>150$  mg/dl or treated for dyslipidemia; and HDL is HDL cholesterol  $< 40/50$  mg/dl for men/women or treated for dyslipidemia. Percentages are expressed within clusters.
