# Supplementary figures and images for: Hepatic Involvement across the Metabolic Syndrome Spectrum: Non-Invasive Assessment and Risk Prediction Using Machine Learning
Source: MDPI journal article supplement (doi:10.3390/jcm12175657), 2023-08-30

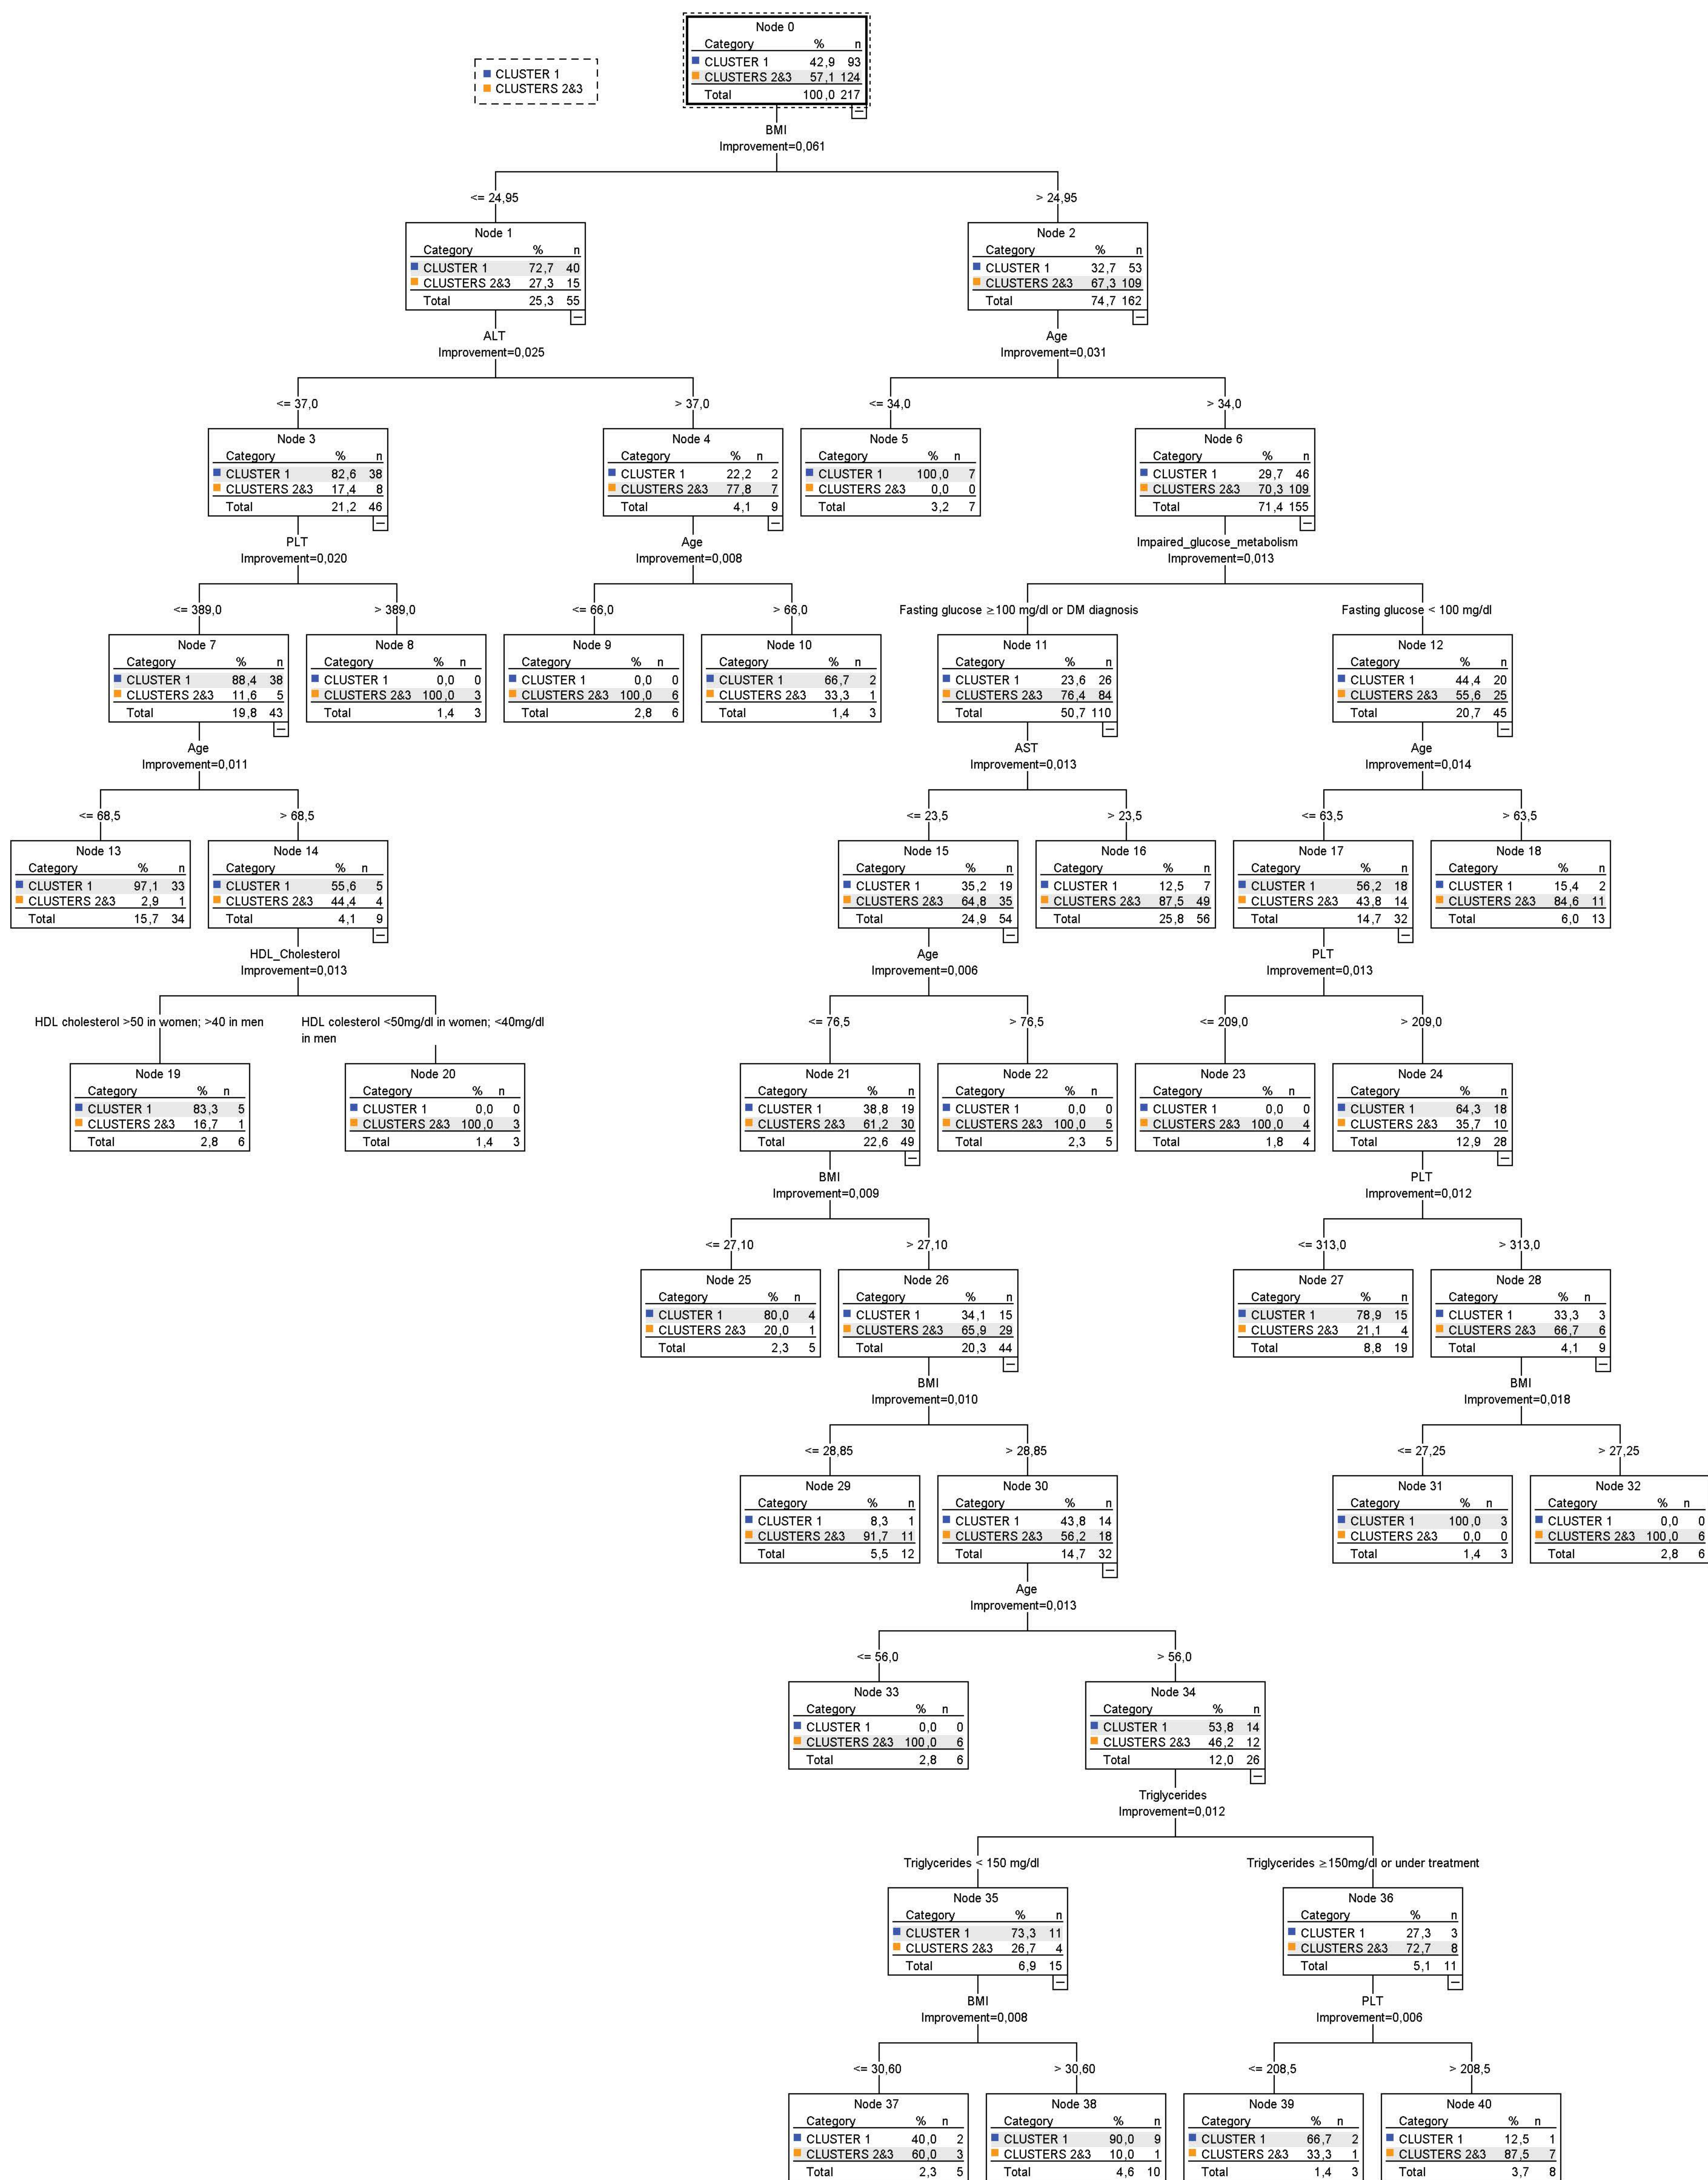

Supplement: s1 [file s1]
